# Supplementary material for: Comprehensive understanding of intrinsic mobility and sub-10 nm quantum transportation in Ga2SSe monolayer
Source: Royal Society of Chemistry journal article supplement (doi:10.1039/d2cp01690g), 2022-01-01
Supplement: d2cp01690g1.pdf [file d2cp01690g1.pdf]

Supporting Information for

**Comprehensive understanding of intrinsic mobility and sub-10 nm quantum  
transportation in Ga<sub>2</sub>SSe monolayer**

Baisheng Sa<sup>1,\*</sup>, Xiaotian Shen<sup>1</sup>, Shuchang Cai<sup>1</sup>, Zhou Cui<sup>1</sup>, Rui Xiong<sup>1</sup>, Chao Xu<sup>2</sup>, Cuilian Wen<sup>1,\*\*</sup>,  
and Bo Wu<sup>1</sup>

<sup>1</sup>*Multiscale Computational Materials Facility, and Key Laboratory of Eco-materials Advanced  
Technology, College of Materials Science and Engineering, Fuzhou University, Fuzhou 350108, P. R.  
China*

<sup>2</sup>*Xiamen Talentmats New Materials Science & Technology Co., Ltd., Xiamen 361015,  
P. R. China*

**Corresponding Authors:** \*bssa@fzu.edu.cn (B. Sa); \*\*clwen@fzu.edu.cn (C. Wen)

Table S1. The sound velocities and acoustic energies of the acoustic modes at high symmetry points

for Ga<sub>2</sub>SSe monolayer

| Acoustic mode | Sound velocity (m/s) | Acoustic energy (meV) |       |      |
|---------------|----------------------|-----------------------|-------|------|
|               |                      | G                     | K     | M    |
| ZA            | 204                  | 0                     | 7.24  | 7.51 |
| TA            | 2834                 | 0                     | 9.39  | 8.95 |
| LA            | 4851                 | 0                     | 13.65 | 9.92 |

Table S2. Transport parameters of Ga<sub>2</sub>SSe FET with different doping concentrations and transport directions for the gate length of 9 nm

| Polarity direction | Doping type    | Doping concentration (cm <sup>-3</sup> ) | $I_{on}$ (μA/μm) | $SS$ (mV/dec) | $I_{on}/I_{off}$     |
|--------------------|----------------|------------------------------------------|------------------|---------------|----------------------|
| Armchair           | <i>n</i> -type | 1×10 <sup>20</sup>                       | 659              | 64            | 6.59×10 <sup>3</sup> |
|                    |                | 2×10 <sup>20</sup>                       | 1828             | 68            | 1.82×10 <sup>4</sup> |
|                    |                | 3×10 <sup>20</sup>                       | 2351             | 72            | 2.35×10 <sup>4</sup> |
|                    |                | 4×10 <sup>20</sup>                       | 2181             | 77            | 2.18×10 <sup>4</sup> |
|                    |                | 5×10 <sup>20</sup>                       | 2021             | 81            | 2.02×10 <sup>4</sup> |
|                    | <i>p</i> -type | 1×10 <sup>21</sup>                       | 614              | 88            | 6.14×10 <sup>3</sup> |
|                    |                | 2×10 <sup>21</sup>                       | 1234             | 95            | 1.23×10 <sup>4</sup> |
|                    |                | 3×10 <sup>21</sup>                       | 1661             | 94            | 1.66×10 <sup>4</sup> |
|                    |                | 4×10 <sup>21</sup>                       | 1791             | 95            | 1.79×10 <sup>4</sup> |
|                    |                | 5×10 <sup>21</sup>                       | 1077             | 97            | 1.07×10 <sup>4</sup> |
| Zigzag             | <i>n</i> -type | 6×10 <sup>20</sup>                       | 764              | 89            | 7.64×10 <sup>3</sup> |
|                    |                | 7×10 <sup>20</sup>                       | 1564             | 63            | 1.56×10 <sup>4</sup> |
|                    |                | 8×10 <sup>20</sup>                       | 1631             | 65            | 1.63×10 <sup>4</sup> |
|                    |                | 9×10 <sup>20</sup>                       | 1741             | 64            | 1.74×10 <sup>4</sup> |
|                    |                | 1×10 <sup>21</sup>                       | 900              | 98            | 9.0×10 <sup>3</sup>  |
|                    | <i>p</i> -type | 1×10 <sup>21</sup>                       | 648              | 88            | 6.48×10 <sup>3</sup> |
|                    |                | 2×10 <sup>21</sup>                       | 1198             | 97            | 1.19×10 <sup>4</sup> |
|                    |                | 3×10 <sup>21</sup>                       | 1293             | 100           | 1.29×10 <sup>4</sup> |
|                    |                | 4×10 <sup>21</sup>                       | 1218             | 105           | 1.21×10 <sup>4</sup> |
|                    |                | 5×10 <sup>21</sup>                       | 954              | 112           | 9.54×10 <sup>3</sup> |

Table S3. Transport parameters of Ga<sub>2</sub>SSe FET with different gate lengths and different gate positions along the armchair direction

| $L_g$<br>(nm) | Gate<br>position | $I_{on}$<br>( $\mu\text{A}/\mu\text{m}$ ) | $SS$<br>(mV/dec) | $I_{on}/I_{off}$   |
|---------------|------------------|-------------------------------------------|------------------|--------------------|
| 5             | Top              | -                                         | 252              | -                  |
|               | Bottom           | 14                                        | 267              | $1.40 \times 10^2$ |
|               | Double           | 88                                        | 189              | $8.80 \times 10^2$ |
| 7             | Top              | 517                                       | 132              | $5.17 \times 10^3$ |
|               | Bottom           | 603                                       | 138              | $6.03 \times 10^3$ |
|               | Double           | 1768                                      | 104              | $1.76 \times 10^4$ |
| 9             | Top              | 1015                                      | 87               | $1.01 \times 10^4$ |
|               | Bottom           | 1238                                      | 89               | $1.23 \times 10^4$ |
|               | Double           | 2351                                      | 72               | $2.35 \times 10^4$ |

(a) Quantum ATK

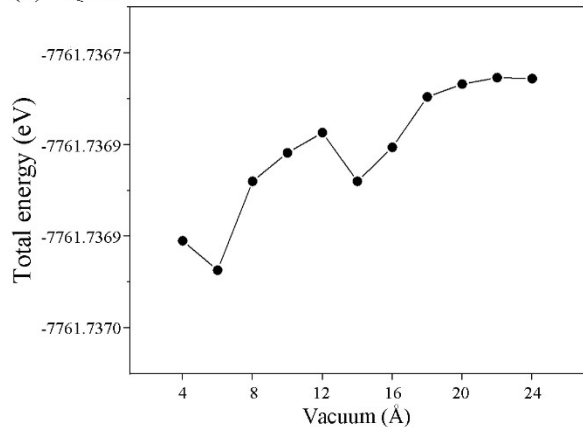

(b) VASP

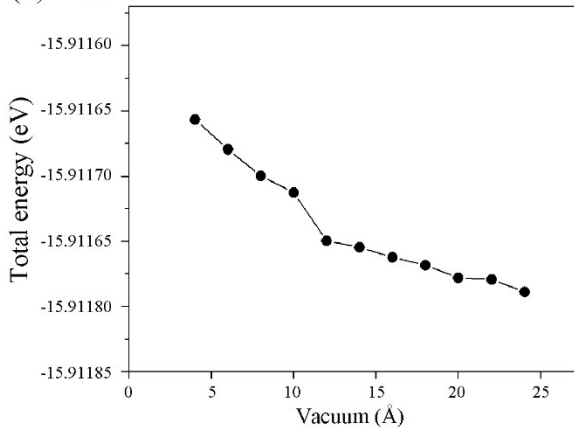

(c) Quantum ATK

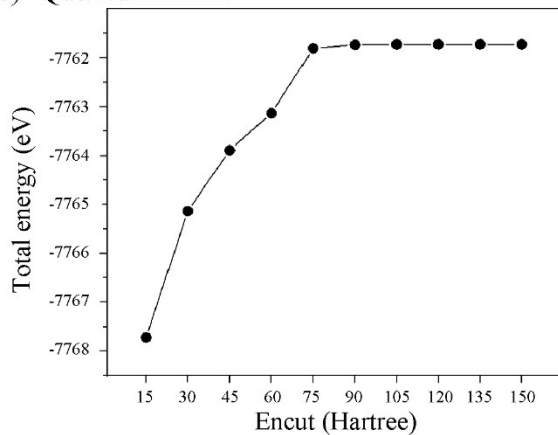

(d) VASP

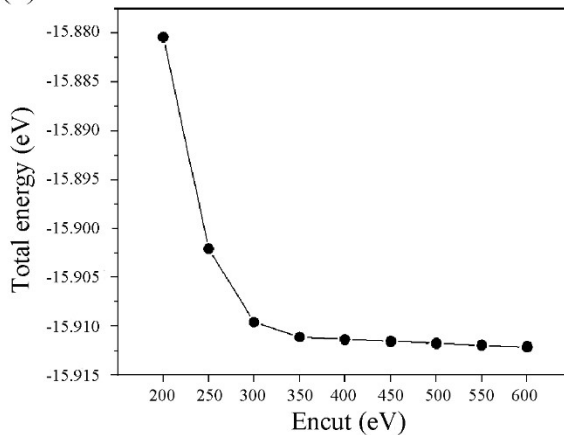

(e) Quantum ATK

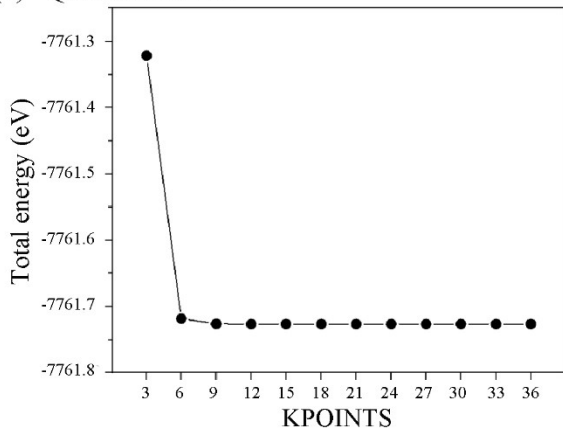

(f) VASP

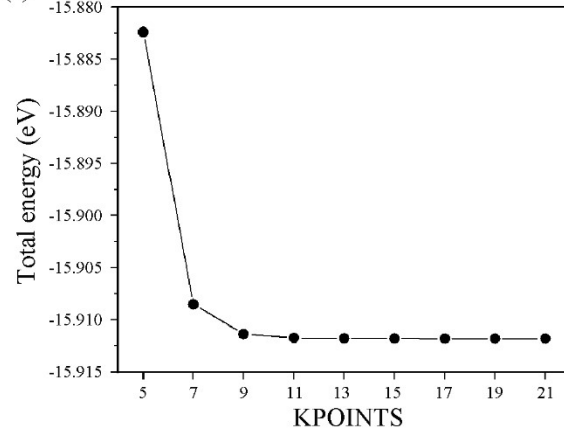

Fig. S1 The (a, b) vacuum thickness, (c, d) cutoff energy and (e, f) KPOINTS mesh test results.

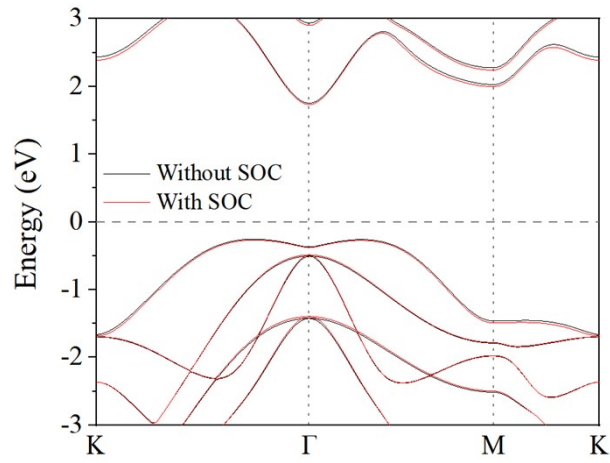

Fig. S2 The band structures for Ga<sub>2</sub>SSe monolayer without and with including the spin orbital coupling (SOC) effect. The Fermi energy is set to 0 eV.

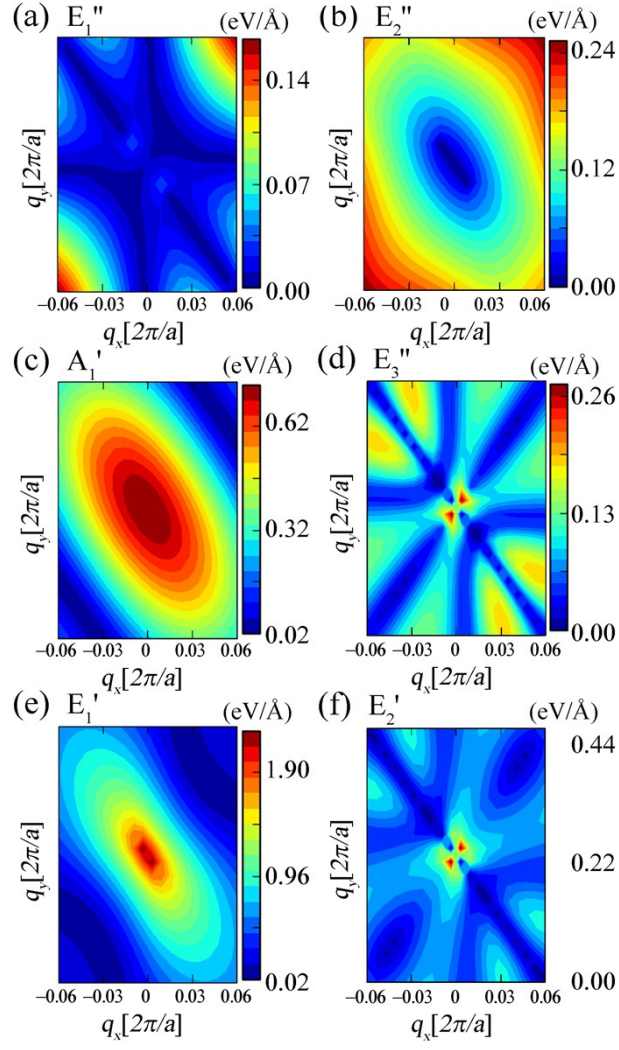

Fig. S3 The electron-phonon interaction matrix elements of the (a)  $E_1''$ , (b)  $E_2''$ , (c)  $A_1'$ , (d)  $E_3''$ , (e)  $E_1'$ , (f)  $E_2'$  phonon modes.

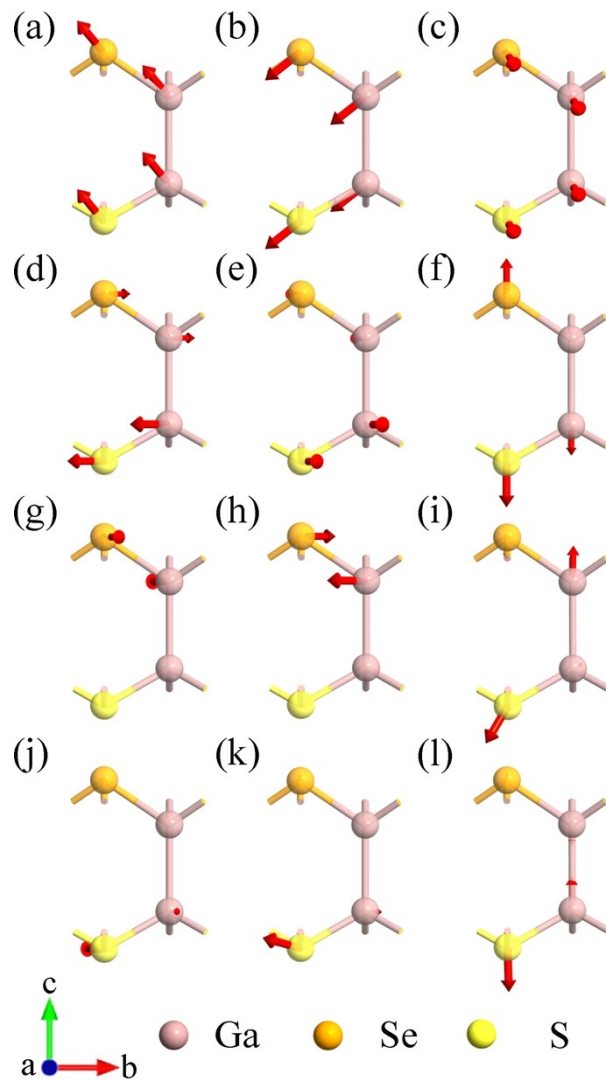

Fig. S4 The atomic dispersions for the (a) ZA, (b) TA, (c) LA, (d)  $E_1''$ , (e)  $E_2''$ , (f)  $A_1'$ , (g)  $E_3''$ , (h)  $E_4''$ , (i)  $E_1'$ , (j)  $E_2'$  (k)  $A''$ , (l)  $A_2'$  phonon modes.
